# Supplementary material for: Enhancing bacteriophage therapeutics through in situ production and release of heterologous antimicrobial effectors
Source: Springer Nature journal article supplement (doi:10.1038/s41467-023-39612-0), 2023-07-20
Supplement: MOESM1 [file 41467_2023_39612_MOESM1_ESM.pdf]

# **Enhancing bacteriophage therapeutics through in situ production and release of heterologous antimicrobial effectors**

## **Supplementary Material**

### **Supplementary Figures**

**Supplementary Fig. 1.** Analysis of UTI incidents within the Zurich Uropathogen Collection.

**Supplementary Fig. 2.** Phage resistance development upon treatment of UTI isolates with wildtype E2 and K1.

**Supplementary Fig. 3.** Reporter phage-based urinalysis of patient urine samples with phage and colicin E7 susceptibility screening of isolated, patient-derived *E. coli* strains.

**Supplementary Fig. 4.** Further in vitro analysis of HEPT activity against clinical *E. coli* strains of different phage- and ColE7-sensitivity.

### **Supplementary Tables**

**Supplementary Table 1.** Phages used in the present study and their propagation hosts.

**Supplementary Table 2.** Peptidoglycan hydrolase (EC300) payload assessment.

**Supplementary Table 3.** Primers and templates used for synthetic HEPTs construction.

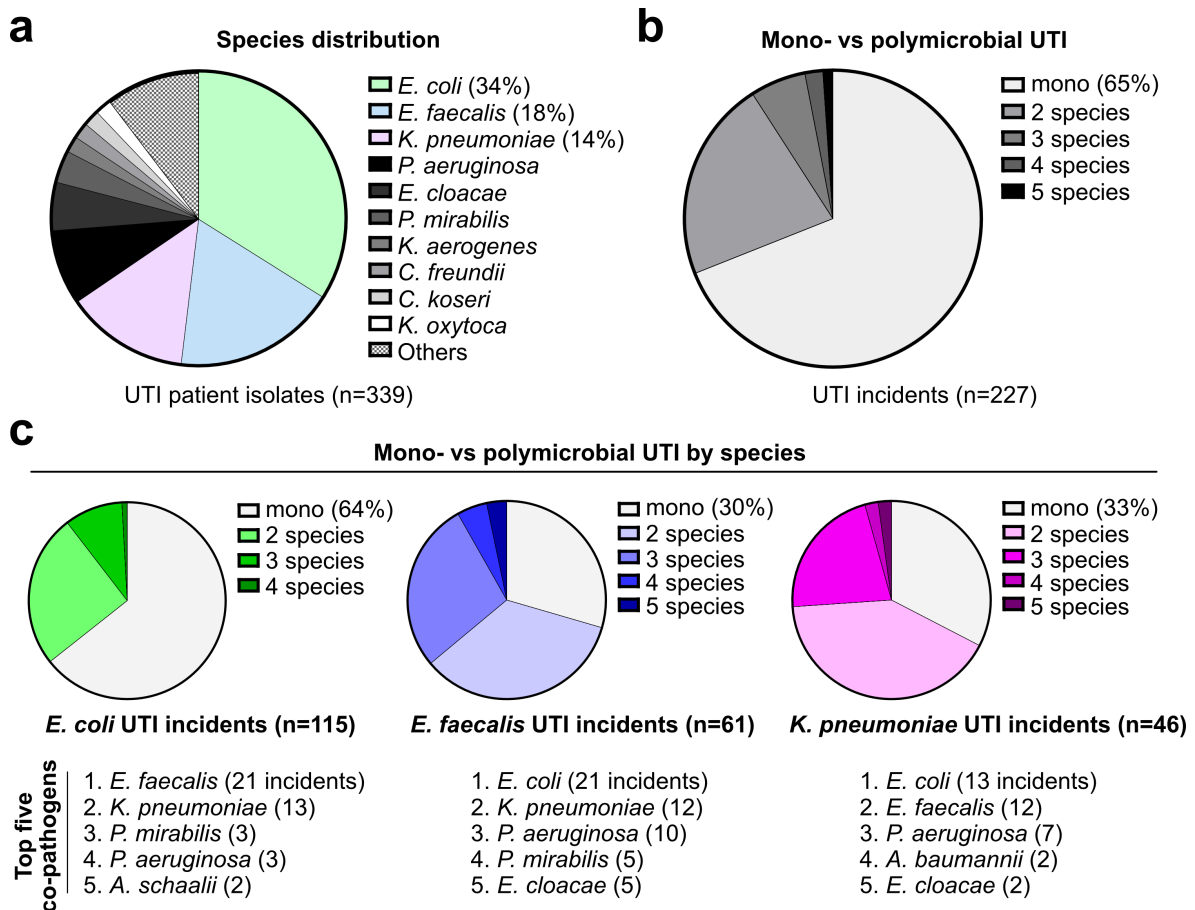

**Supplementary Fig. 1. Analysis of UTI incidents within the Zurich Uropathogen Collection.** The Zurich Uropathogen Collection<sup>1</sup> comprises 663 isolates from 442 incidents of asymptomatic bacteriuria (n=215) or UTI (n=227). **(a)** The species distribution of 339 isolates acquired from UTI patients was determined and **(b)** the occurrence of mono- vs polymicrobial infections quantified for the corresponding UTI incidents. **(c)** UTI incidents involving the top three uropathogens were analyzed separately to determine the top five co-infecting species and the frequency of mono- and polymicrobial UTIs. Source data are provided as a Source Data file.

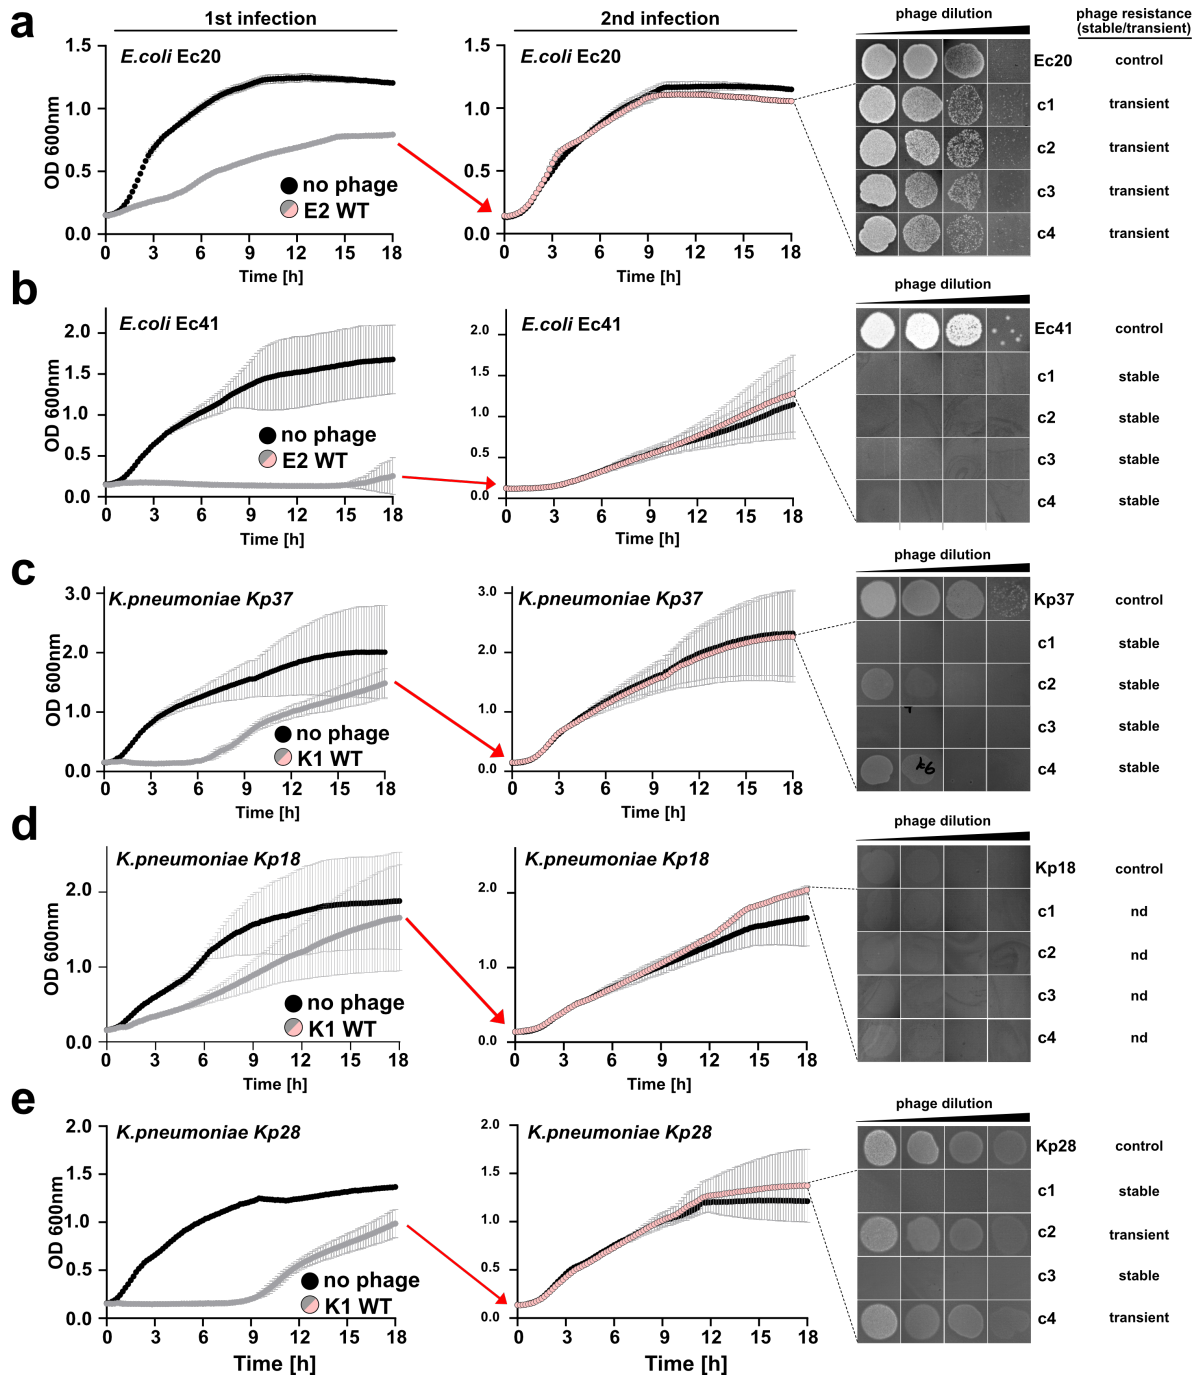

**Supplementary Fig. 2. Phage resistance development upon treatment of UTI isolates with wildtype E2 and K1.** Phage resistance development was assessed by two consecutive rounds of phage infection of bacterial cultures in SHU medium. Turbidity reduction assays were performed for *E. coli* isolates Ec20 (a) and Ec41 (b) or *K. pneumoniae* isolates Kp37 (c), Kp18 (d) and Kp28 (e) infected with  $10^8$  PFU/mL of phages E2 or K1, respectively, with optical density monitored for 18 h. Phage-exposed cultures were combined ( $n=3$ ), re-adjusted to OD<sub>600nm</sub> of 0.1 in SHU and incubated for another 18 h with additional wildtype (WT) phages (pink) or media alone (black). Growth kinetics were compared to non-infected controls. After the second round of infection, individual clonal survivors were isolated, purified via three consecutive rounds of streaking, and assessed for phage susceptibility using spot-on-the-lawn assays. Progenies of bacterial survivors that retained resistance to phage plaquing were considered as stably resistant, whereas those that regained permissiveness to phage plaquing were rendered transiently resistant. Non-infected clones served as positive controls. Turbidity data are technical triplicates shown as mean  $\pm$  SD. nd = not determined. Source data are provided as a Source Data file.

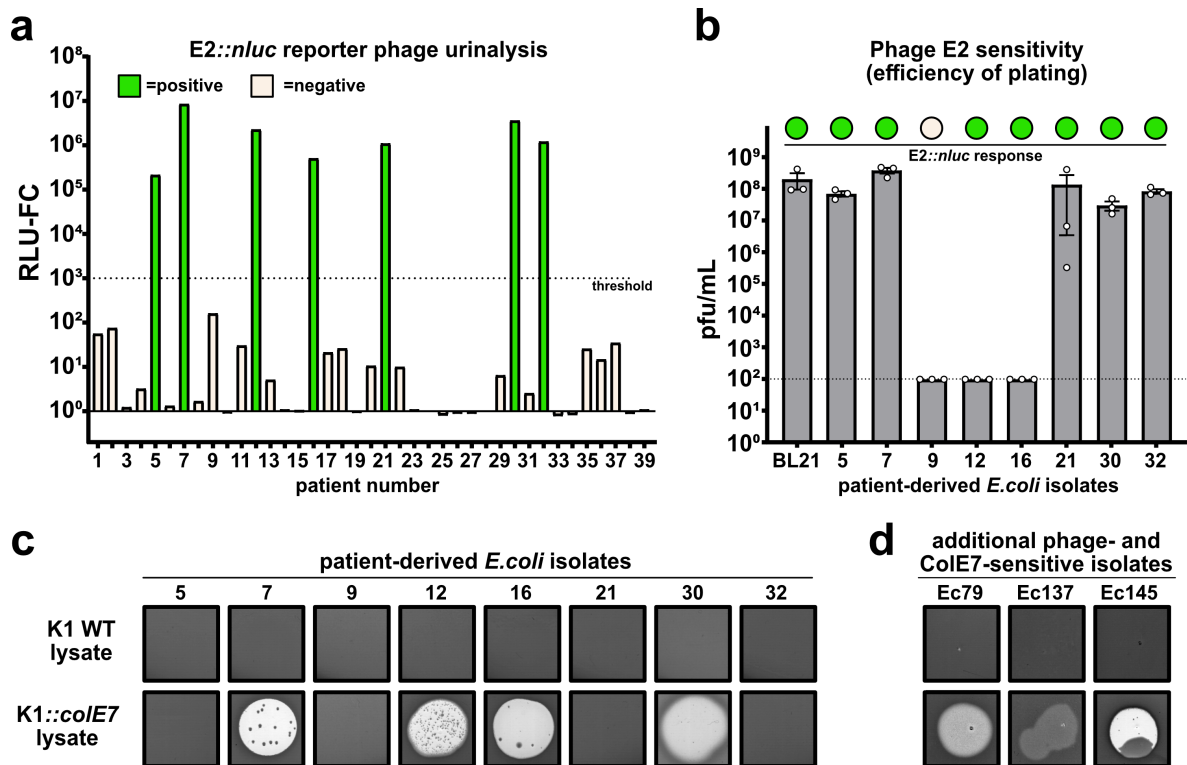

**Supplementary Fig. 3. Reporter phage-based urinalysis of patient urine samples with phage and colicin E7 susceptibility screening of isolated, patient-derived *E. coli* strains.** (a) Reporter phage urinalysis was performed using 39 fresh patient urine samples from the Balgrist University Hospital, Zurich, Switzerland, as described in Fig. 4a. The fold change (compared to phage-only control) in relative light units (RLU-FC) was determined at 3 hours post-infection with urine samples producing values  $>10^3$  considered as positive samples, i.e., containing E2-susceptible *E. coli*. Values are derived from single experiment. (b) All *E. coli* strains were isolated and purified from patient urine after differential plating, and E2-susceptibility quantified using plaque assays (efficiency of plating). Dotted line indicates the detection limit of plaque assays. Values are derived from three independent experiments and depicted as mean  $\pm$  SEM. (c-d) Colicin E7 effector susceptibility was determined on patient-derived *E. coli* strains from this study (c) or from the Zurich Uropathogen Collection<sup>1</sup> (d) by spotting K1 WT or K1::colE7 phage lysates onto growing bacterial lawns of the indicated bacterial isolates (see also Fig. 1d for strains Ec82, Ec47, and MVASt0072). Source data are provided as a Source Data file.

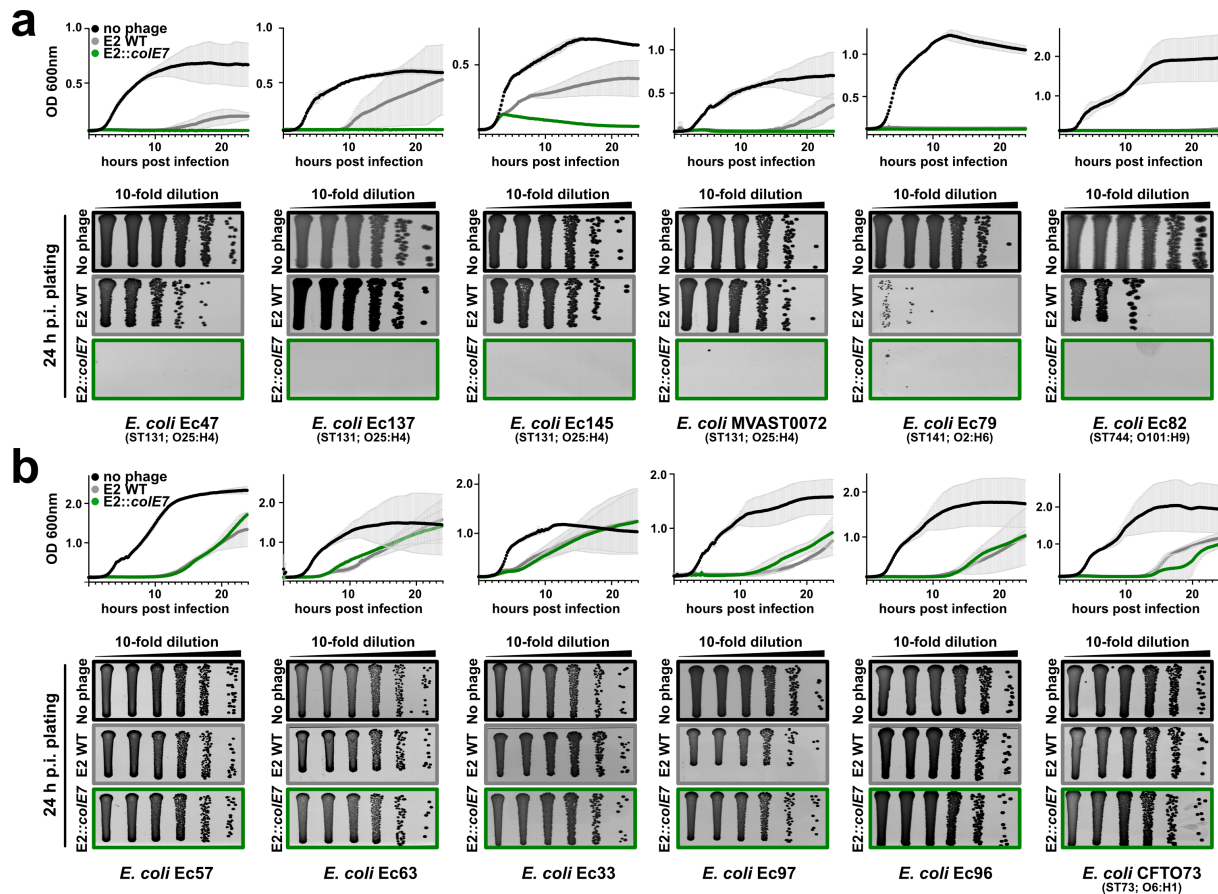

**Supplementary Fig. 4. Further in vitro analysis of HEPT activity against clinical *E. coli* strains of different phage- and ColE7-sensitivity.** Performance of E2 wildtype (WT) and E2::colE7 was compared against phage- and ColE7-sensitive strains (**a**) and phage-sensitive but ColE7-resistant strains (**b**) from the Zurich Uropathogen Collection<sup>1</sup> as well as *E. coli* MVA0072 using 24 h turbidity reduction assays in SHU with endpoint plating. In accordance with data provided in **Fig. 4**, enhanced and sustained killing was observed with E2::colE7 for all strains showing sensitivity to both phage and ColE7. OD<sub>600nm</sub> = optical density at 600 nm. Turbidity data are technical triplicates shown as mean ± SD. Source data are provided as a Source Data file.

**Supplementary Table 1. Phages used in the present study and their propagation hosts.**

| Phage                | Taxonomic classification (GenBank #)                                                  | Genome Size [bp] | Payload Target         | Payload Nature                       | Propagation Host                      | Source     |
|----------------------|---------------------------------------------------------------------------------------|------------------|------------------------|--------------------------------------|---------------------------------------|------------|
| E2 WT                | <i>Caudoviricetes; Straboviridae; Tevenvirinae; Tequatrovirus</i> (UTI-E2; OL870316)  | 166,367          | -                      | -                                    | <i>E. coli</i> BL21                   | [1]        |
| E2:: <i>kvarM</i>    |                                                                                       | 167,219          | <i>Klebsiella spp.</i> | colM-like murein synthesis inhibitor | <i>E. coli</i> BL21                   | this study |
| E2:: <i>colE7</i>    |                                                                                       | 168,119          | <i>E. coli</i>         | unspecific cytosolic nuclease        | <i>E. coli</i> BL21 (pIm immE7)       | this study |
| E2:: <i>ec300</i>    |                                                                                       | 167,291          | <i>Enterococcus</i>    | chimeric cell wall-hydrolase         | <i>E. coli</i> BL21                   | this study |
| E2:: <i>nluc</i>     |                                                                                       | 166,904          | <i>E. coli</i>         | Nanoluciferase                       | <i>E. coli</i> BL21                   | [1]        |
| K1 WT                | <i>Caudoviricetes; Straboviridae; Tevenvirinae; Jiaodavirus</i> (UTI-K1; OL870318)    | 170,051          | -                      | -                                    | <i>K. pneumoniae</i> KpGe             | [1]        |
| K1:: <i>kvarM</i>    |                                                                                       | 170,903          | <i>Klebsiella spp.</i> | colM-like murein synthesis inhibitor | <i>K. pneumoniae</i> KpGe             | this study |
| K1:: <i>colE6</i>    |                                                                                       | 171,728          | <i>E. coli</i>         | 16s rRNase                           | <i>K. pneumoniae</i> KpGe (pIm immE6) | this study |
| K1:: <i>colE7</i>    |                                                                                       | 171,803          | <i>E. coli</i>         | unspecific cytosolic nuclease        | <i>K. pneumoniae</i> KpGe (pIm immE7) | this study |
| K1:: <i>colM</i>     |                                                                                       | 170,888          | <i>E. coli</i>         | murein synthesis inhibitor           | <i>K. pneumoniae</i> KpGe             | this study |
| CM001 WT             | <i>Caudoviricetes; Guernseyvirinae; Kagunavirus</i> (UTI-CM001; OM810255)             | 41,222           | -                      | -                                    | <i>E. coli</i> Ec20                   | this study |
| CM001:: <i>ec300</i> |                                                                                       | 42,146           | <i>Enterococcus</i>    | chimeric cell wall-hydrolase         | <i>E. coli</i> Ec20                   | this study |
| EfS3 WT              | <i>Caudoviricetes; Herelleviridae; Brockvirinae; Schiekvirus</i> (UTI-EfS3; OL870611) | 150,393          | -                      | -                                    | <i>E. faecalis</i> JH2-2              | [1]        |
| EfS3:: <i>colE7</i>  |                                                                                       | 152,140          | <i>E. coli</i>         | unspecific cytosolic nuclease        | <i>E. faecalis</i> JH2-2              | this study |
| EfS3:: <i>colM</i>   |                                                                                       | 151,225          | <i>E. coli</i>         | murein synthesis inhibitor           | <i>E. faecalis</i> JH2-2              | this study |
| EfS3:: <i>kvarM</i>  |                                                                                       | 151,240          | <i>Klebsiella spp.</i> | colM-like murein synthesis inhibitor | <i>E. faecalis</i> JH2-2              | this study |
| EfS7 WT              | <i>Caudoviricetes; Saphexavirus</i> (UTI-EfS7; OL870612)                              | 56,144           | -                      | -                                    | <i>E. faecalis</i> Ef57               | [1]        |
| EfS7:: <i>colE7</i>  |                                                                                       | 57,891           | <i>E. coli</i>         | unspecific cytosolic nuclease        | <i>E. faecalis</i> Ef57               | this study |
| EfS7:: <i>colM</i>   |                                                                                       | 56,976           | <i>E. coli</i>         | murein synthesis inhibitor           | <i>E. faecalis</i> Ef57               | this study |
| EfS7:: <i>kvarM</i>  |                                                                                       | 56,991           | <i>Klebsiella spp.</i> | colM-like murein synthesis inhibitor | <i>E. faecalis</i> Ef57               | this study |

**Supplementary Table 2. Peptidoglycan hydrolase (EC300) payload assessment.** 10 µL of phage lysate ( $10^9$ - $10^{10}$  PFU/mL) was spotted on bacterial lawns of the following isolates and activity assessed visually after 16 h incubation at 37°C. ++, complete lysis (clear zone); +, moderate lysis (turbid zone); -, no visible activity. Sources: 1, gift from Leo Meile, ETH Zurich, Switzerland; 2, Zurich Uropathogen Collection (2020).

| Species            | Designation | Source | <i>E. coli</i> phages |                      |
|--------------------|-------------|--------|-----------------------|----------------------|
|                    |             |        | E2:: <i>ec300</i>     | CM001:: <i>ec300</i> |
| <i>E. faecalis</i> | JH2-2       | 1      | ++                    | ++                   |
| <i>E. faecalis</i> | Efs3        | 2      | +                     | ++                   |
| <i>E. faecalis</i> | Efs12       | 2      | +                     | ++                   |
| <i>E. faecalis</i> | Efs17       | 2      | +                     | ++                   |
| <i>E. faecalis</i> | Efs26       | 2      | +                     | ++                   |
| <i>E. faecalis</i> | Efs29       | 2      | ++                    | ++                   |
| <i>E. faecalis</i> | Efs38       | 2      | +                     | +                    |
| <i>E. faecalis</i> | Efs48       | 2      | +                     | ++                   |
| <i>E. faecalis</i> | Efs49       | 2      | +                     | ++                   |
| <i>E. faecalis</i> | Efs57       | 2      | +                     | ++                   |
| <i>E. faecalis</i> | Efs58       | 2      | +                     | ++                   |
| <i>E. faecalis</i> | Efs73       | 2      | ++                    | ++                   |
| <i>E. faecalis</i> | Efs90       | 2      | -                     | -                    |

**Supplementary Table 3. Primers and templates used for synthetic HEPTs construction.**

| Synthetic HEPTs      | Fragment ID | Template                        | Fragment length (bp) | Primers        | Primer Sequence (5'-3')                        |
|----------------------|-------------|---------------------------------|----------------------|----------------|------------------------------------------------|
| CM001:: <i>ec300</i> | CM001 F1    | CM001 gDNA                      | 3391                 | CM001 F1.1 Fw  | TCAACGCTTGACAGCCGCA                            |
|                      |             |                                 |                      | CM001 F1.1 Bw  | TTACTTGTCCGCGTCGGCG                            |
|                      | CM001_ec300 | E/K_ec300 synthetic gene string | 974                  | CM001_ec300 Fw | GGCAATCGCCGACGCGGACAAGTAAAGTACGAGGAGGTAAATATAT |
|                      |             |                                 |                      | CM001_ec300 Bw | CCCCTTTGTTTTTACTCCAACCGTATTAAGATTTTTTGGTGATACC |
|                      | CM001 F1.2  | CM001 gDNA                      | 6433                 | CM001 F1.2 Fw  | TACGGTTGGAGTAAAAACAAAGGG                       |
|                      |             |                                 |                      | CM001 F1.2 Bw  | TCGGCCTCAGCTTCGTAATAA                          |
|                      | CM001 F2    | CM001 gDNA                      | 10013                | CM001 F2 Fw    | AAGGATTAAATAATGAACTTTCTGATTT                   |
|                      |             |                                 |                      | CM001 F2 Bw    | TTATTTATCTTCTAGTGCTGCCA                        |
|                      | CM001 F3    | CM001 gDNA                      | 11231                | CM001 F3 Fw    | GTTCTTCATAGAGATTGCCTATC                        |
|                      |             |                                 |                      | CM001 F3 Bw    | AGTACAAATCATCAAAGTAAGCA                        |
| EfS7:: <i>colE7</i>  | EfS7 F1.1   | EfS7 gDNA                       | 12126                | EfS7 F1.1 Fw   | AAAATCCTCTATAAGGCGTCC                          |
|                      |             |                                 |                      | EfS7 F1.1 Bw   | ACTTGAGCATCAATAACCCAC                          |
|                      | EfS7_colE7  | pEdit_EfS7_colE7                | 2539                 | EfS7_colE7 Fw  | AAATGACTGATAGCTACGAGTG                         |
|                      |             |                                 |                      | EfS7_colE7 Bw  | TTTGCTTCCGTCAGAAGC                             |
|                      | EfS7 F2.1   | EfS7 gDNA                       | 10031                | EfS7 F2.1 Fw   | TTCTCAAAGACTATGTCTCTAGC                        |
|                      |             |                                 |                      | EfS7 F2.1 Bw   | AACCCTTGCAAACCTTCTTACC                         |
|                      | EfS7 F3     | EfS7 gDNA                       | 11293                | EfS7 F3 Fw     | ACTTGCCTCCTGAACTTGG                            |
|                      |             |                                 |                      | EfS7 F3 Bw     | TCCTTTAGTGTCATTATCAGTGC                        |
|                      | EfS7 F4     | EfS7 gDNA                       | 11182                | EfS7 F4 Fw     | CGACAACATCATCATAGGCACT                         |
|                      |             |                                 |                      | EfS7 F4 Bw     | GTTCATCATAACCTACGTGACC                         |
|                      | EfS7 F4     | EfS7 gDNA                       | 10961                | EfS7 F5 Fw     | CATAAATCCATTCTAAGAGGTCACG                      |
|                      |             |                                 |                      | EfS7 F5 Bw     | CTTGTCGGGAAGTGTGTC                             |



## Supplementary References

1. Meile, S. et al. Engineered reporter phages for detection of *Escherichia coli*, *Enterococcus*, and *Klebsiella* in urine. *Nature Communications* <https://doi.org/10.1038/s41467-023-39863-x> (2023).
